# Supplementary material
Source: PubMed Central journal article supplement (PMC6027922)

## SUPPLEMENTARY DATA

**Supplement Table S1. Inbred strains used in this study**

| Strain       | Female (n) | Male (n) |
|--------------|------------|----------|
| 129X1/SvJ    | 2          | 3        |
| A/J          | 3          | 3        |
| AKR/J        | 2          | 3        |
| AXB-10/PgnJ  | 3          | 3        |
| AXB-12/PgnJ  | 2          | 2        |
| AXB-13/PgnJ  | 3          | 3        |
| AXB-15/PgnJ  | 3          | 3        |
| AXB-18/PgnJ  | 3          | 2        |
| AXB-19/PgnJ  | 3          | 3        |
| AXB-20/PgnJ  | 2          | 3        |
| AXB5/PgnJ    | 2          | 2        |
| BALB/cJ      | 3          | 3        |
| BTBRT<+>tf/J | 3          | 3        |
| BUB/BnJ      | 3          | 3        |
| BXA-1/PgnJ   | 3          | 3        |
| BXA-11/PgnJ  | 3          | 3        |
| BXA-14/PgnJ  | 3          | 3        |
| BXA-16/PgnJ  | 3          | 3        |
| BXA-2/PgnJ   | 2          | 3        |
| BXA-24/PgnJ  | 3          | 3        |
| BXA-4/PgnJ   | 3          | 2        |
| BXA-7/PgnJ   | 3          | 2        |
| BXA-8/PgnJ   | 3          | 2        |
| BXD-12/TyJ   | 3          | 3        |
| BXD-13/TyJ   | 3          | 2        |
| BXD-14/TyJ   | 3          | 1        |
| BXD-15/TyJ   | 2          | 2        |
| BXD-19/TyJ   | 3          | 3        |
| BXD-20/TyJ   | 3          | 3        |
| BXD-21/TyJ   | 3          | 3        |
| BXD-24/TyJ   | 2          | 3        |
| BXD-31/TyJ   | 2          | 2        |
| BXD-32/TyJ   | 3          | 3        |
| BXD-34/TyJ   | 2          | 2        |
| BXD-38/TyJ   | 3          | 3        |
| BXD-40/TyJ   | 3          | 3        |
| BXD43        | 3          | 3        |

|             |   |   |
|-------------|---|---|
| BXD44       | 3 | 3 |
| BXD45       | 3 | 3 |
| BXD48       | 2 | 2 |
| BXD49       | 2 | 3 |
| BXD-5/TyJ   | 2 | 2 |
| BXD50       | 3 | 3 |
| BXD51       | 3 | 3 |
| BXD55       | 3 | 3 |
| BXD56       | 3 | 3 |
| BXD-6/TyJ   | 3 | 2 |
| BXD60       | 3 | 2 |
| BXD61       | 3 | 3 |
| BXD62       | 3 | 1 |
| BXD64       | 3 | 3 |
| BXD66       | 2 | 3 |
| BXD68       | 3 | 3 |
| BXD70       | 3 | 2 |
| BXD71       | 4 | 4 |
| BXD73       | 1 | 4 |
| BXD74       | 3 | 2 |
| BXD75       | 3 | 3 |
| BXD79       | 3 | 4 |
| BXD84       | 2 | 3 |
| BXD85       | 3 | 2 |
| BXD86       | 2 | 3 |
| BXD87       | 3 | 3 |
| BXD-9/TyJ   | 3 | 3 |
| BXH-19/TyJ  | 3 | 1 |
| BXH-6/TyJ   | 3 | 3 |
| BXH-8/TyJ   | 3 | 3 |
| BXH-9/TyJ   | 3 | 3 |
| BXHA1       | 3 | 3 |
| BXHB2       | 3 | 3 |
| C3H/HeJ     | 4 | 2 |
| C57BL/6J    | 3 | 3 |
| C57BLKS/J   | 2 | 3 |
| C58/J       | 2 | 3 |
| CBA/J       | 3 | 2 |
| CE/J        | 2 | 3 |
| CXB-11/HiAJ | 3 | 2 |
| CXB-12/HiAJ | 2 | 3 |
| CXB-13/HiAJ | 2 | 3 |
| CXB-3/ByJ   | 2 | 2 |

|           |   |   |
|-----------|---|---|
| CXB-6/ByJ | 2 | 3 |
| CXB-7/ByJ | 3 | 2 |
| CXBH      | 3 | 3 |
| DBA/2J    | 3 | 3 |
| FVB/NJ    | 3 | 3 |
| I/LnJ     | 3 | 3 |
| KK/HIJ    | 3 | 3 |
| MA/MyJ    | 3 | 3 |
| NOD/LtJ   | 3 | 2 |
| NON/LtJ   | 3 | 3 |
| NZB/BINJ  | 3 | 3 |
| NZW/LacJ  | 3 | 3 |
| PL/J      | 3 | 3 |
| RIIS/J    | 3 | 3 |
| SEA/GnJ   | 3 | 3 |
| SJL/J     | 3 | 3 |
| SM/J      | 3 | 3 |
| SWR/J     | 3 | 3 |

---

**Supplement Figure S1. Identification of specific MRM transitions for ceramide standards.** Product ion scans of two ceramide model standards, Cer(d18:1/6:0) and Cer(d18:0/6:0), performed in negative ionization mode. The main fragment (m/z B) found for the two standards investigated was m/z 140.1.

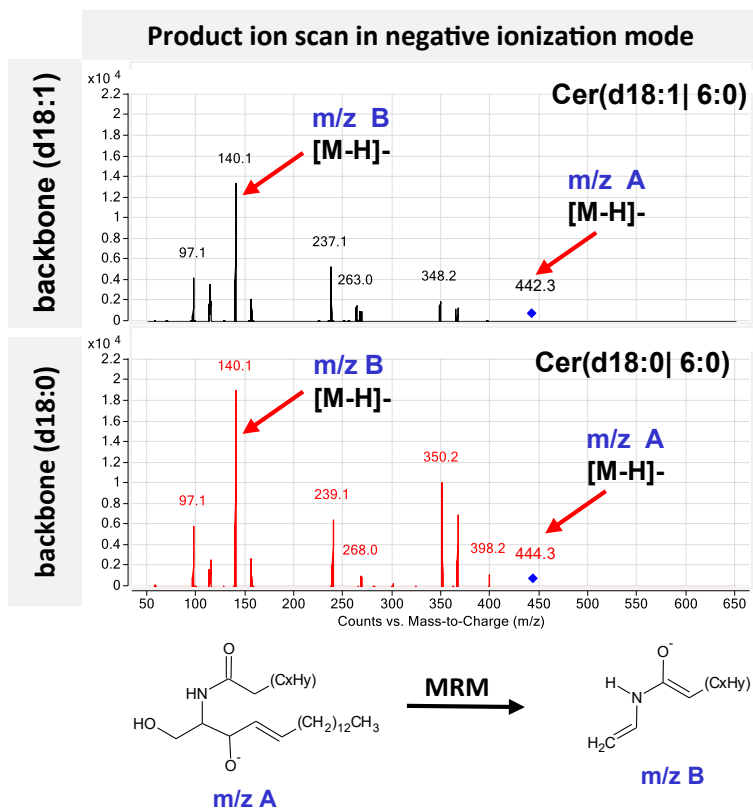

**Supplement Table S2. Eight specific MRM transitions used to verify and quantify the ceramides**

| Number | Ceramide        | MRM transition |
|--------|-----------------|----------------|
| 1      | Cer(d18:1/16:0) | 582.5 – 280.2  |
| 2      | Cer(d18:0/16:1) | 582.5 – 278.2  |
| 3      | Cer(d18:1/18:0) | 610.5 – 308.2  |
| 4      | Cer(d18:0/18:1) | 610.5 – 306.2  |
| 5      | Cer(d18:1/20:0) | 638.5 – 336.2  |
| 6      | Cer(d18:0/20:1) | 638.5 – 334.2  |
| 7      | Cer(d18:1/22:0) | 666.5 – 364.3  |
| 8      | Cer(d18:0/22:1) | 666.5 – 362.3  |

**Supplement Figure S2. Identification of hepatic Cer(d18:1/16:0), Cer(d18:1/18:0), Cer(d18:1/20:0) and Cer(d18:1/22:0) ceramides.** A representative total ion chromatogram showing four identified ceramides with d18:1 backbone in a hepatic lipid extract (A). Ceramides with d18:0 backbone were not detected in any of the samples analyzed. The specific multiple reaction monitoring mode transitions for the detected hepatic Cer(C18:1/16:0), Cer(C18:1/18:0), Cer(C18:1/20:0) and Cer(18:1/22:0) ceramides (B).

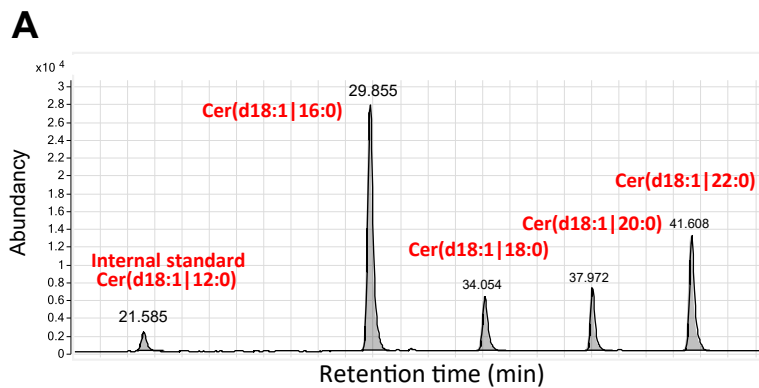

**B**

**Ceramide with d18:1 backbone**

| Type                                    | m/z (MS1) | m/z (MS2) |
|-----------------------------------------|-----------|-----------|
| <i>Cer(d18:1 16:0) - Ceramide C16:0</i> | 582.5     | 280.2     |
| <i>Cer(d18:1 18:0) - Ceramide C18:0</i> | 610.5     | 308.2     |
| <i>Cer(d18:1 20:0) - Ceramide C20:0</i> | 638.5     | 336.2     |
| <i>Cer(d18:1 22:0) - Ceramide C22:0</i> | 666.5     | 364.3     |

**Supplement Figure S3. Correlations between hepatic ceramides measured with targeted and untargeted lipidomics.**

Correlation between of hepatic Cer(d18:1/16:0) (A), Cer(d18:1/C18:0) (B), and Cer(d18:1/C20:0) (C) ceramides measured with LC-MS/MS (targeted) and HPLC-TOF-MS (untargeted) lipidomics.

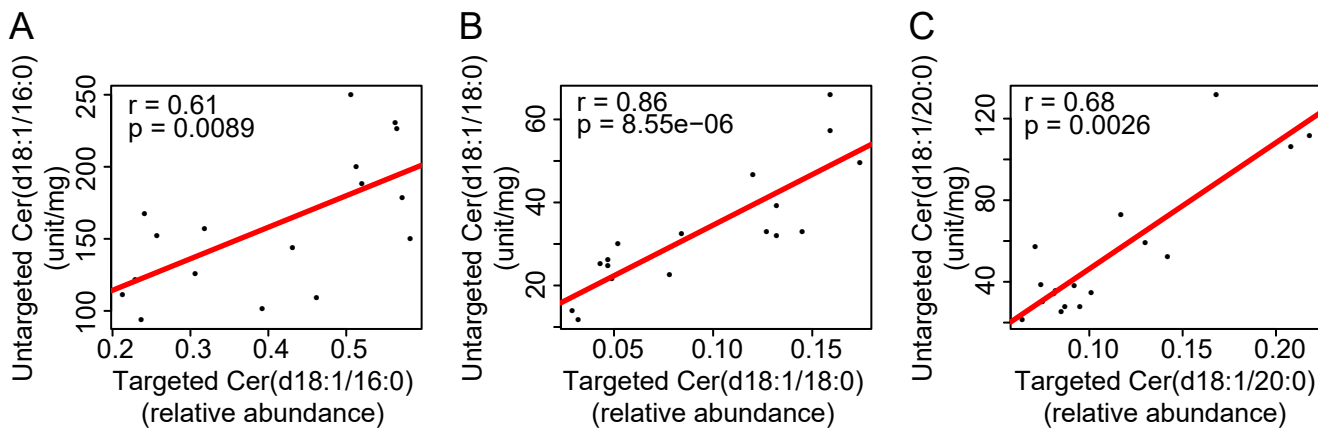

**Supplement Figure S4. Sex differences in hepatic Cer(d18:1/16:0), Cer(d18:1/18:0) and Cer(18:1/20:0) ceramides.** Hepatic Cer(d18:1/16:0) (A), Cer(d18:1/18:0) (B) and Cer(18:1/20:0) (C) ceramides in individual female (red) and male (blue) mice from five different strains (n = 1-3 per sex and strain). Each bar represents values from individual mice. The hepatic ceramide levels were measured with LC-MS/MS.

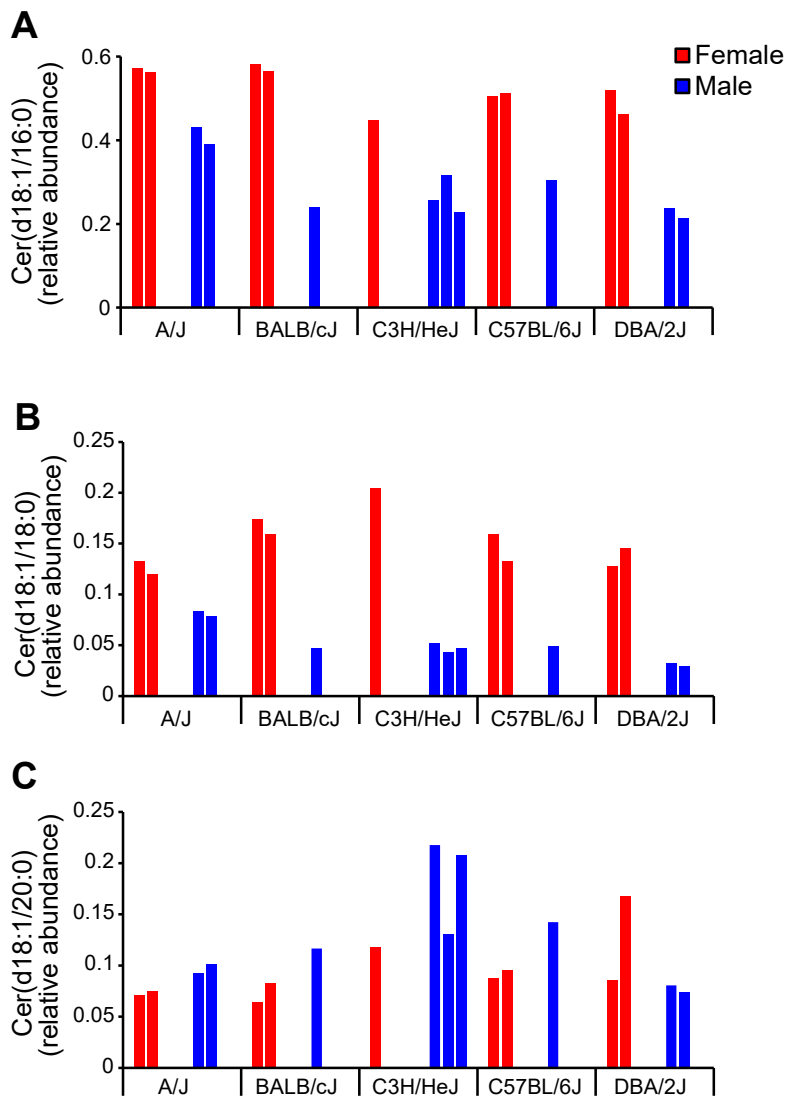

Supplement: 10.1194_M081398_jlr.M081398-1.pdf [file 10.1194_M081398_jlr.M081398-1.pdf]
